# Supplementary material for: FANCI and FANCD2 have common as well as independent functions during the cellular replication stress response
Source: PubMed Central journal article supplement — Nucleic Acids Res. 2017 Oct 20;45(20):11837–57. doi: 10.1093/nar/gkx847 (PMC5714191; doi:10.1093/nar/gkx847), 2017-10-20
Supplement: gkx847_supp.pdf [file gkx847_supp.pdf]

# Supplementary Figure S1

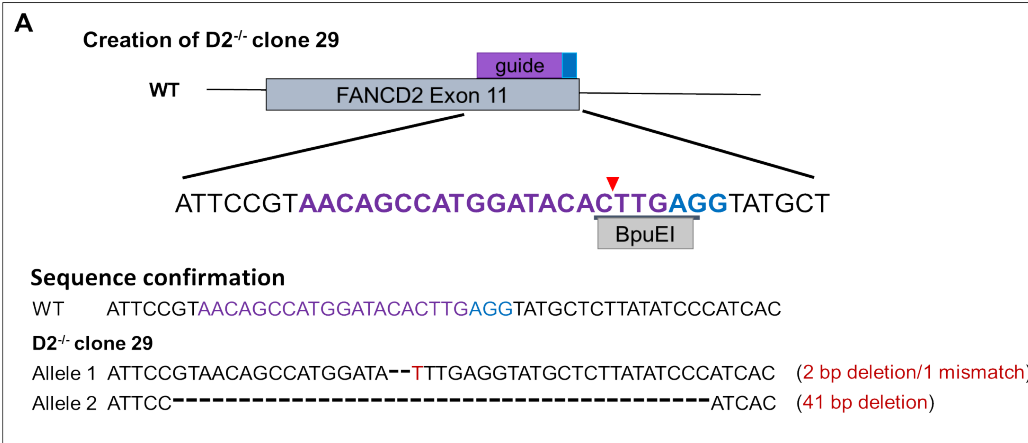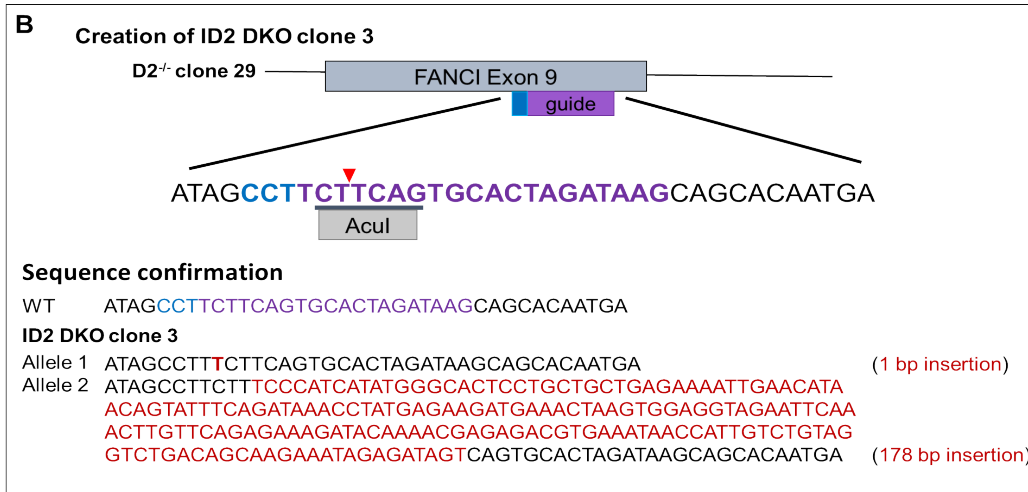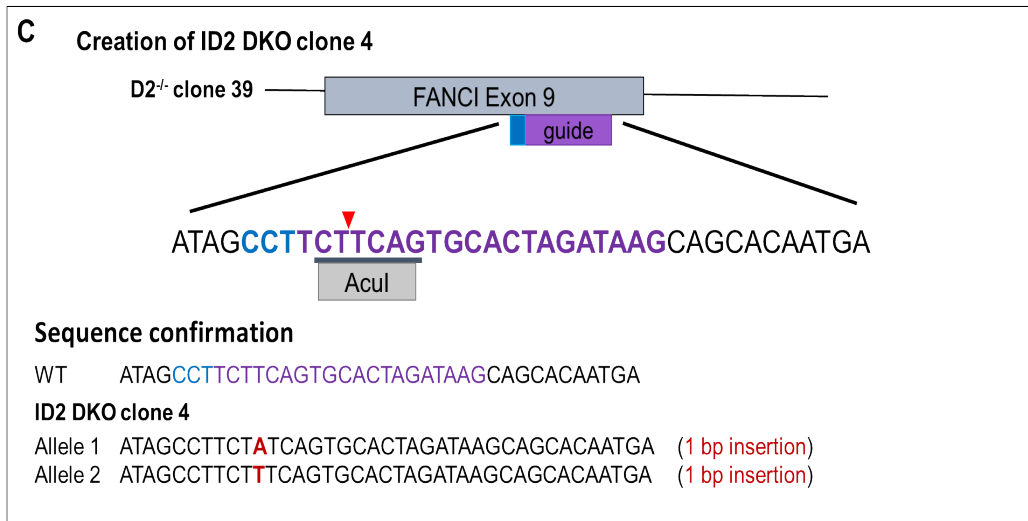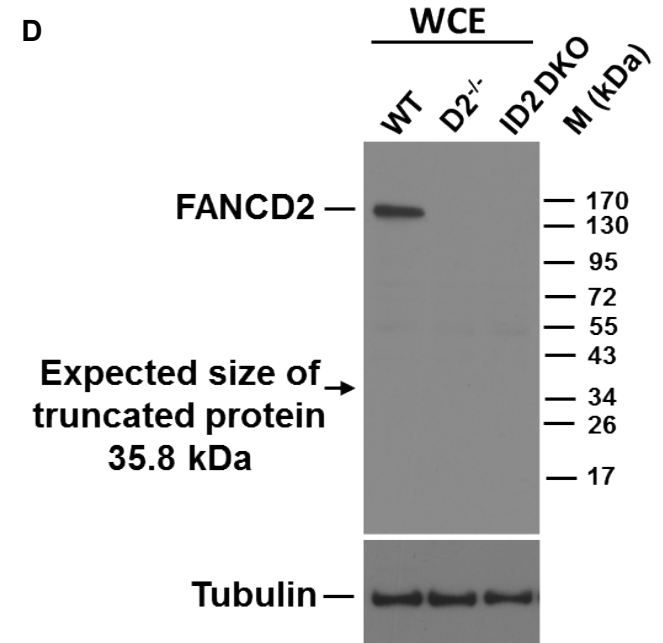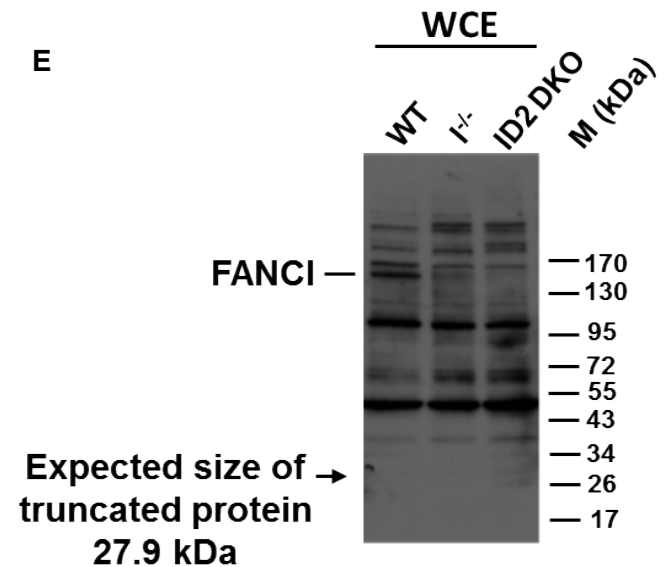

# Supplementary Figure S2

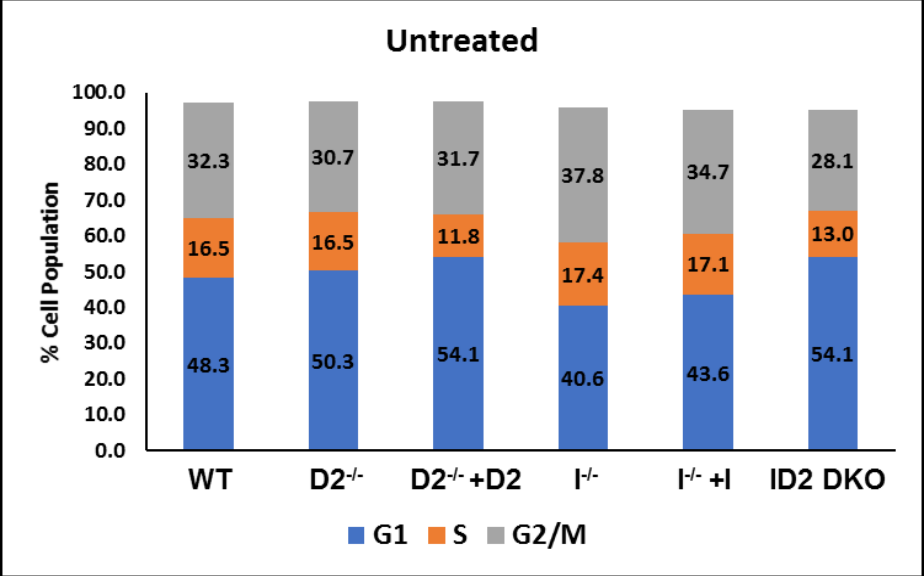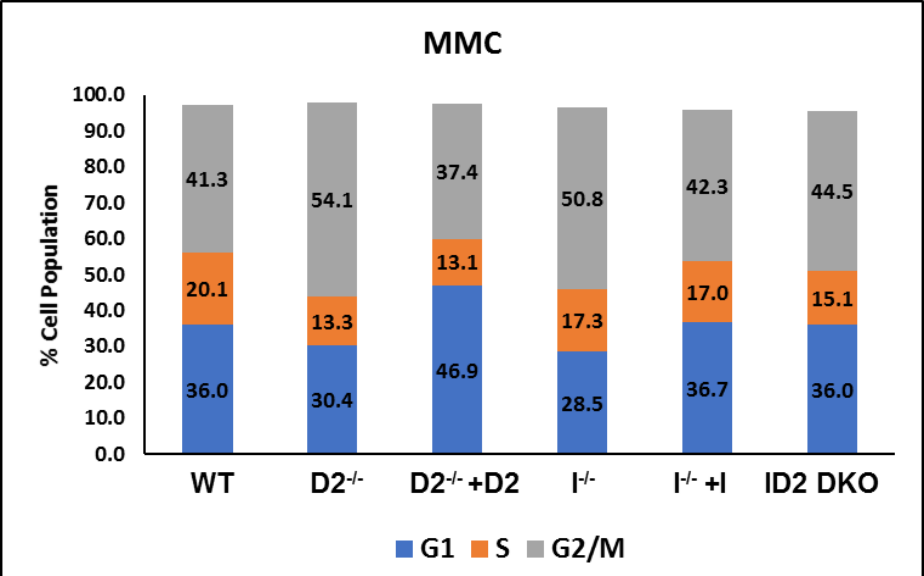

# Supplementary Figure S3

A

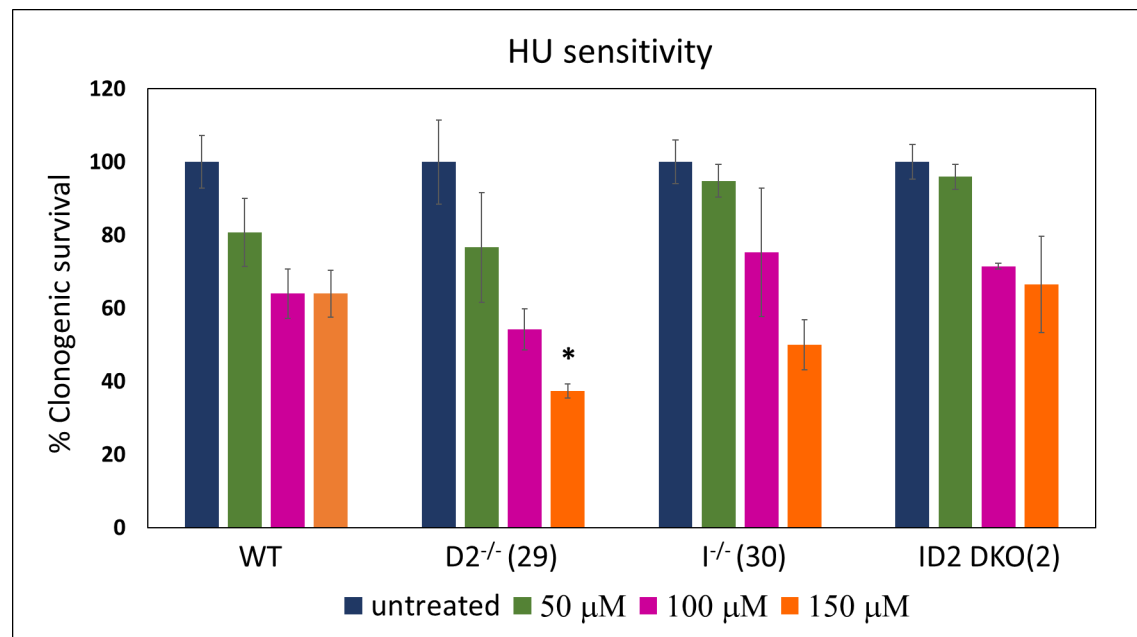

B

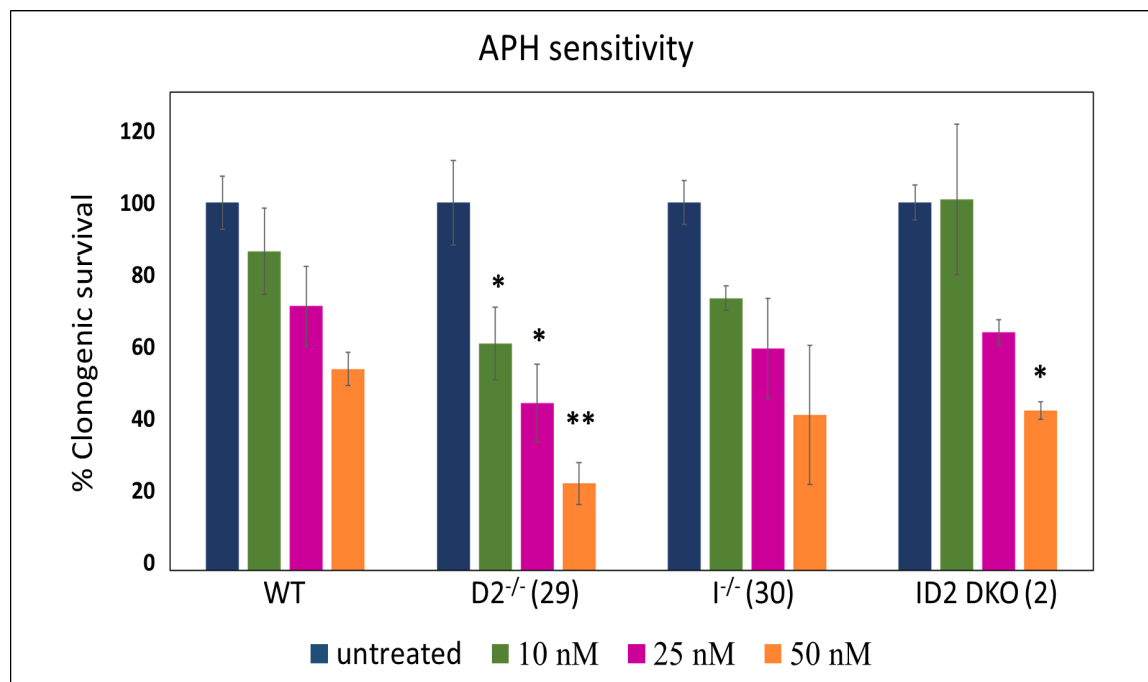

Supplementary Figure S4

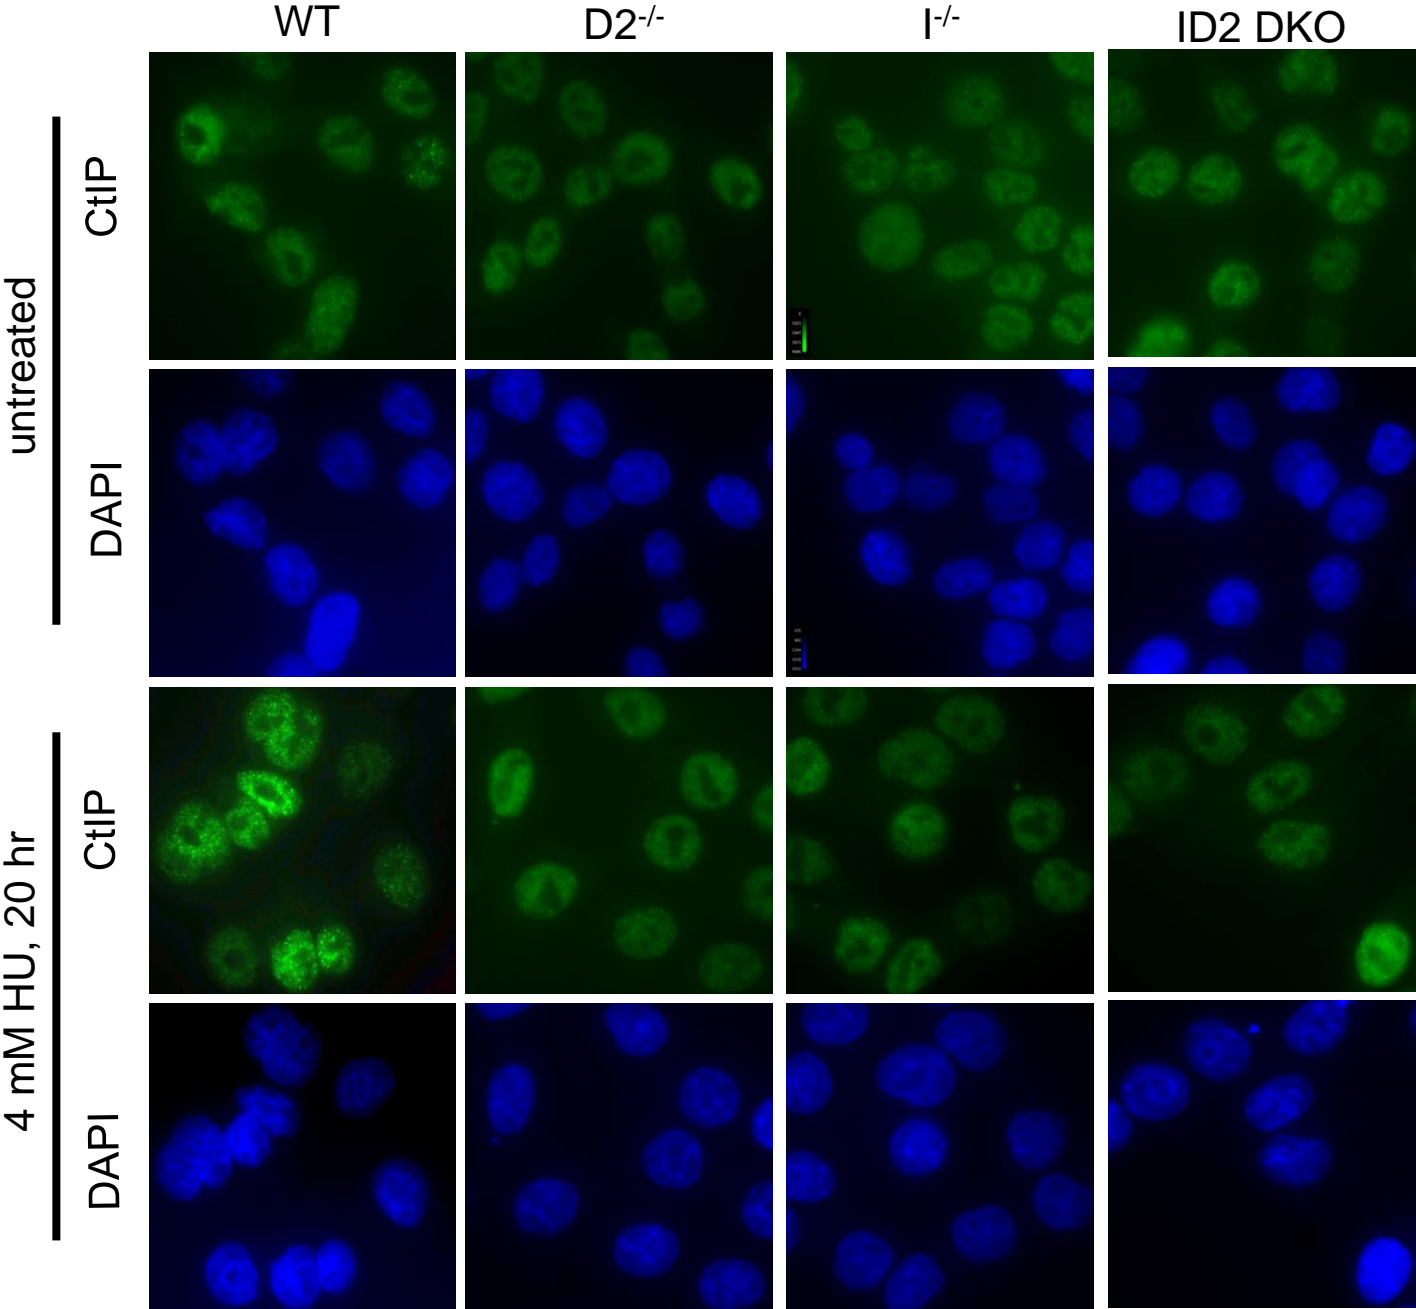

Supplementary Figure S5

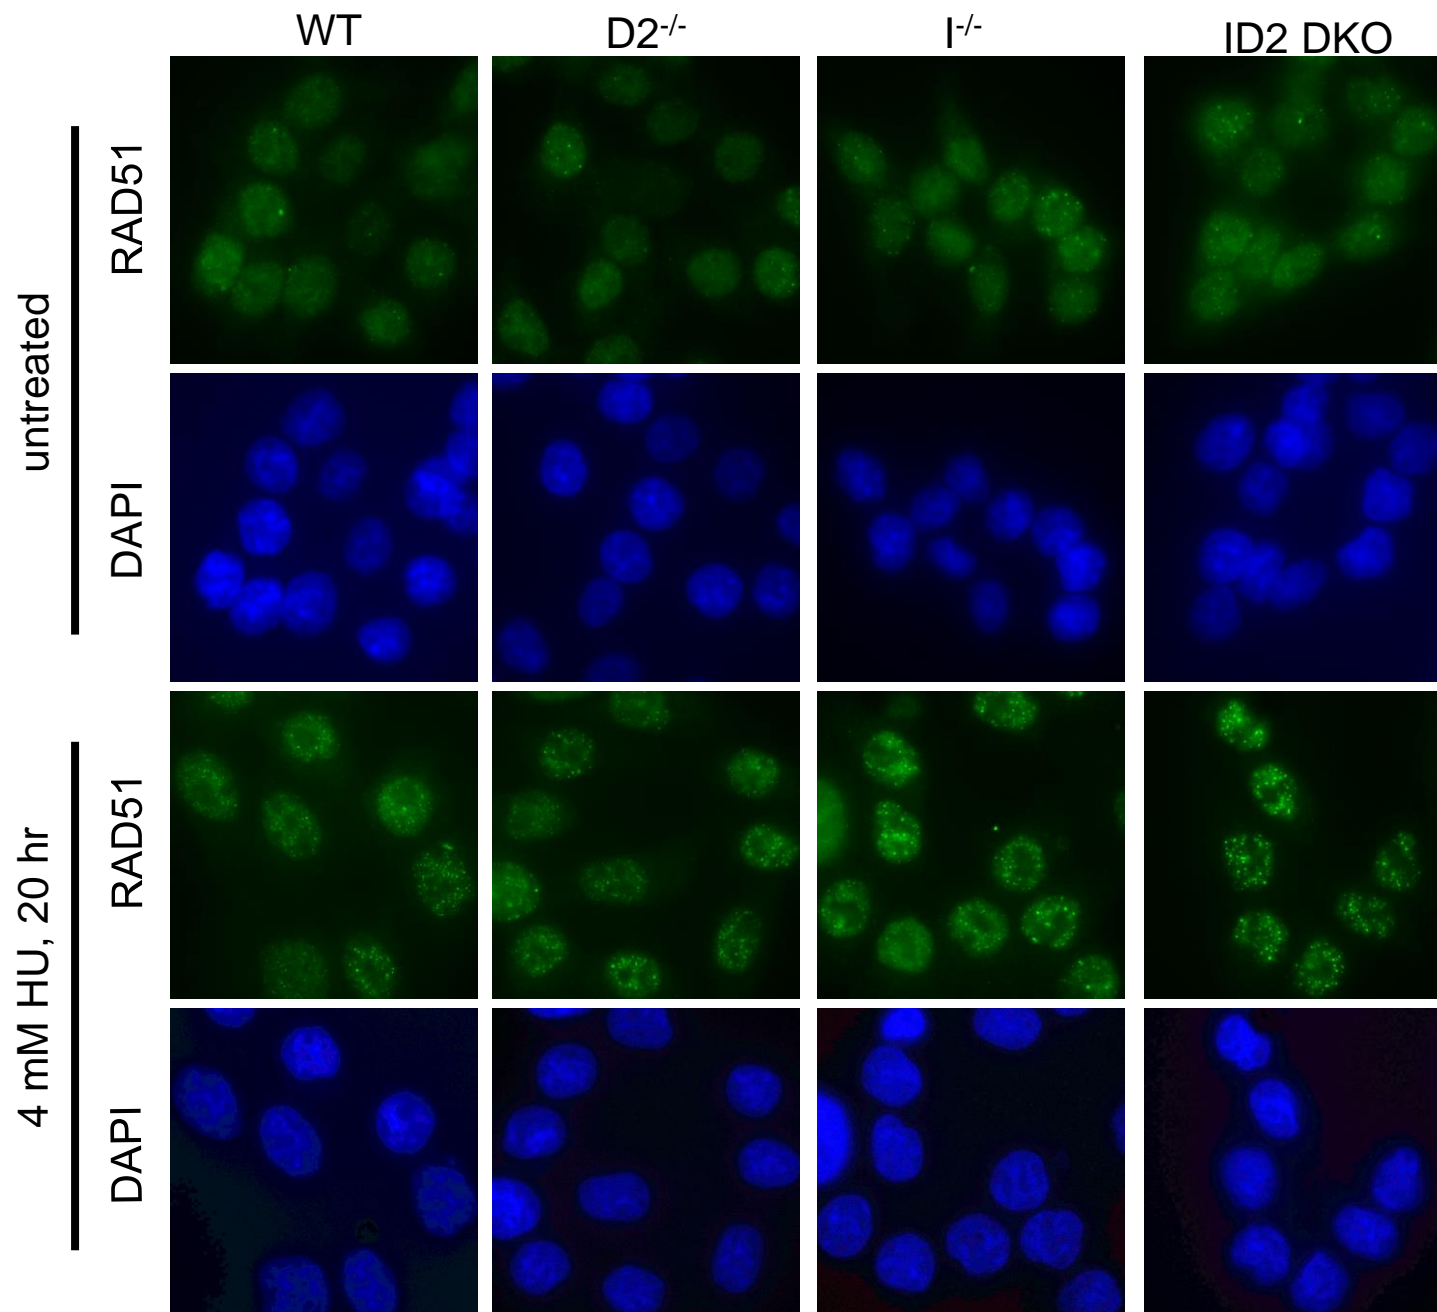

# Supplementary Figure S6

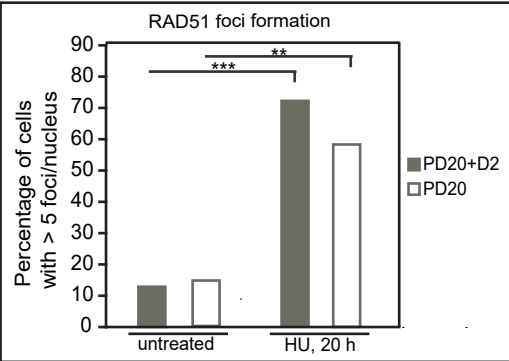

## Supplementary Figure S7

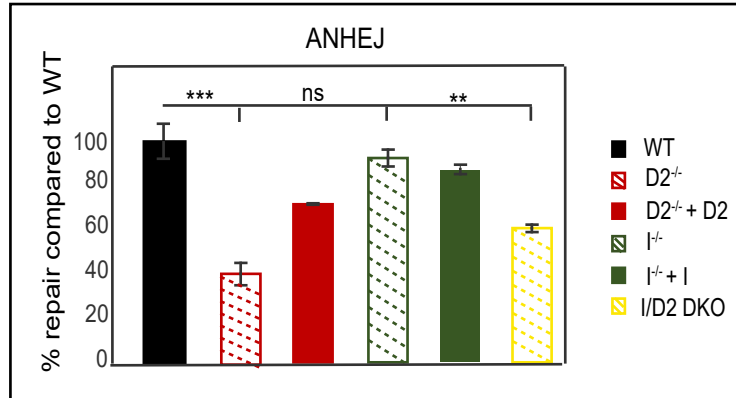

## Supplementary Table S1

### Primers

#### FANCD2 rAAV Conditional Vector Targeting Exon 12: Golden Gate Cloning primers

|               |                                                     |
|---------------|-----------------------------------------------------|
| hFANCD2_LF_GG | GACGCTCTTCACCGTGACCCAACTTCCTATTGA                   |
| hFANCD2_LR_GG | GACGCTCTTCTGAGGTTGCTTTATCTAGGTGTGA                  |
| hFANCD2_RF_GG | GACGCTCTTCGGCACAGACTAACTGAGAATACTGAC                |
| hFANCD2_IR_GG | GACGCTCTTCGGTATGCTATACGAAGTTATGGATTGATCTGAATGGCTAAG |
| hFANCD2_IF_GG | GACGCTCTTCCTACATTATACGAAGTTATCAGACGACAGTGCAAGTT     |
| hFANCD2_RR_GG | GACGCTCTTCCCGCCGCCACCTCAGATTATCTT                   |

#### FANCD2 rAAV Knockout Vector Targeting Exon 12: Golden Gate Cloning primers

|                 |                                       |
|-----------------|---------------------------------------|
| FANCD2-St KO-LF | GACGCTCTTCACCG GTGACCTACTGATAGAGAATAC |
| FANCD2-St KO-LR | GACGCTCTTCTGAG TAAGAGCATACTCAAGTGT    |
| FANCD2-ST KO-RF | GACGCTCTTCGTCAAAGAGCTCATCCTCACAC      |
| FANCD2-ST KO-RR | GACGCTCTTCCATGTTGACAGTGGACAGATTGA     |

#### FANCD2 Allele Determination rAAV Targeting

|                |                        |
|----------------|------------------------|
| FANCD2_EX11SF  | ATTCTTCATTCCGTAACAGC   |
| FANCD2_LoxP SR | GACAACCTCATGTATAAGATGG |

#### FANCI rAAV Conditional Vector Targeting Exon 10: Golden Gate Cloning primers

|                 |                                                    |
|-----------------|----------------------------------------------------|
| Fancl_GG_LF     | GACGCTCTTCACCGGCTCAGGAGTTCAAGACC                   |
| Fancl_GG_LR     | GACGCTCTTCTGAGTCAAGACCAGCCTCTACTAA                 |
| Fanclcond_GG_RF | GACGCTCTTCGTCACTCCTGGGATCAAGTGAT                   |
| Fanclcond_GG_IR | GACGCTCTTCGGTATGCTATACGAAGTTATGAGTGTGGTAACATCATGTA |
| Fanclcond_GG_IF | GACGCTCTTCCTACATTATACGAAGTTATTAATGTCCTCACTTTAGCAG  |
| Fanclcond_GG_RR | GACGCTCTTCCATGGAACAACCAAATGCAATGC                  |

#### FANCI Allele Determination rAAV Targeting

|                   |                      |
|-------------------|----------------------|
| Fanclc_GG_LIF     | GCAATGGCACAATCTTGG   |
| Fanclcond_GG_LoxR | ATAGGACTTTCTGGCTTGCT |

#### CRISPR/Cas9 Targeting of FANCD2 Exon 11

|                      |                       |
|----------------------|-----------------------|
| FANCD2 gRNA sequence | AACAGCCATGGATACACTTG  |
| FancD2_CC_F2         | GGAAGATGGAGTAAGAGAAGT |
| FancD2_CC_R2         | TGCTCATTTCATAGTGGGTAG |

#### CRISPR/Cas9 Targeting of FANCI Exon 9

|                     |                     |
|---------------------|---------------------|
| FANCI gRNA sequence | CTTATCTAGTGCCTGAAGA |
| Fancl_CC_F3         | TTCTCTGCTCCCAAGTTTC |
| Fancl_CC_R3         | TGTGCTGAGGTGAAGGTA  |



Supplementary Table S2

| Figure                  | samples                                           | p-value (two tales)               |            |
|-------------------------|---------------------------------------------------|-----------------------------------|------------|
| 4A                      | D2 <sup>-/-</sup> vs I <sup>-/-</sup>             | 0.033561                          |            |
|                         | D2 <sup>-/-</sup> vs ID2 DKO                      | 0.0000029                         |            |
|                         | I <sup>-/-</sup> vs ID2 DKO                       | 0.0000065                         |            |
|                         | WT vs I <sup>-/-</sup>                            | 0.0000115                         |            |
|                         | WT vs D2 <sup>-/-</sup>                           | 0.0000308                         |            |
| 5A-B                    | WT vs D2 <sup>-/-</sup> + HU 50 μM                | ns                                |            |
|                         | WT vs D2 <sup>-/-</sup> + HU 100 μM               | 0.0018921                         |            |
|                         | WT vs D2 <sup>-/-</sup> + HU 150 μM               | 0.0019495                         |            |
|                         | WT vs D2 <sup>-/-</sup> + APH 10 nM               | 0.0310029                         |            |
|                         | WT vs D2 <sup>-/-</sup> + APH 25 nM               | 0.0204921                         |            |
|                         | WT vs D2 <sup>-/-</sup> + APH 50 nM               | 0.0004985                         |            |
|                         | WT vs I <sup>-/-</sup> + HU 50 μM                 | ns                                |            |
|                         | WT vs I <sup>-/-</sup> + HU 100 μM                | ns                                |            |
|                         | WT vs I <sup>-/-</sup> + HU 150 μM                | ns                                |            |
|                         | WT vs I <sup>-/-</sup> + APH 10 nM                | ns                                |            |
|                         | WT vs I <sup>-/-</sup> + APH 25 nM                | ns                                |            |
|                         | WT vs I <sup>-/-</sup> + APH 50 nM                | 0.0120932                         |            |
|                         | WT vs ID2 DKO + HU 50 μM                          | ns                                |            |
|                         | WT vs ID2 DKO + HU 100 μM                         | ns                                |            |
|                         | WT vs ID2 DKO + HU 150 μM                         | ns                                |            |
|                         | WT vs ID2 DKO + APH 10 nM                         | ns                                |            |
|                         | WT vs ID2 DKO + APH 25 nM                         | ns                                |            |
|                         | WT vs ID2 DKO + APH 50 nM                         | ns                                |            |
|                         | 5F                                                | WT + HU vs D2 <sup>-/-</sup> + HU | 0.00021854 |
|                         |                                                   | WT + HU vs I <sup>-/-</sup> + HU  | 0.00040459 |
| WT + HU vs ID2 DKO + HU |                                                   | 0.00062153                        |            |
| 5G                      | WT vs WT + HU                                     | 0.000731473                       |            |
|                         | D2 <sup>-/-</sup> vs D2 <sup>-/-</sup> + HU       | 0.00065732                        |            |
|                         | I <sup>-/-</sup> vs I <sup>-/-</sup> + HU         | 0.000321296                       |            |
|                         | ID2 DKO vs ID2 DKO + HU                           | 0.0001602                         |            |
| 6B                      | WT + APH vs D2 <sup>-/-</sup> + APH               | 0.000595                          |            |
|                         | WT + APH vs I <sup>-/-</sup> + APH                | 0.009439                          |            |
|                         | WT + APH vs ID2 DKO + APH                         | 0.000594                          |            |
|                         | D2 <sup>-/-</sup> + APH vs I <sup>-/-</sup> + APH | 0.001009                          |            |
|                         | D2 <sup>-/-</sup> + APH vs ID2 DKO + APH          | 0.011695                          |            |
| 6C                      | WT + APH vs D2 <sup>-/-</sup> + APH               | 0.002453                          |            |
|                         | WT + APH vs I <sup>-/-</sup> + APH                | 0.014428                          |            |
|                         | WT + APH vs ID2 DKO + APH                         | 0.003668                          |            |
|                         | D2 <sup>-/-</sup> + APH vs I <sup>-/-</sup> + APH | 0.013982                          |            |
| 6E                      | WT + HU vs D2 <sup>-/-</sup> + HU                 | 0.004277                          |            |

| Figure | samples                                       | p-value (two tales) |
|--------|-----------------------------------------------|---------------------|
| 6E     | WT + HU vs I <sup>-/-</sup> + HU              | 0.015219            |
|        | WT + HU vs ID2 DKO + HU                       | 0.00449912          |
| 7C     | WT + HU vs D2 <sup>-/-</sup> + HU             | 0.0002692           |
|        | WT + HU vs I <sup>-/-</sup> + HU              | 0.0195361           |
|        | WT + HU vs I <sup>-/-</sup> (2)+ HU           | ns                  |
|        | WT + HU vs I <sup>-/-</sup> (12)+ HU          | ns                  |
| 8A     | WT vs I <sup>-/-</sup>                        | 0.0240309           |
|        | WT vs ID2 DKO                                 | 0.012311962         |
|        | D2 <sup>-/-</sup> vs I <sup>-/-</sup>         | 9.91012E-06         |
|        | D2 <sup>-/-</sup> vs ID2 DKO                  | 0.00055944          |
| 8B     | WT vs D2 <sup>-/-</sup> + RS-1                | 0.00020194          |
|        | WT vs I <sup>-/-</sup> + RS-1                 | ns                  |
|        | WT vs ID2 DKO + RS-1                          | ns                  |
|        | D2 <sup>-/-</sup> vs I <sup>-/-</sup>         | 0.01322908          |
|        | D2 <sup>-/-</sup> vs ID2 DKO                  | 0.01258901          |
|        | D2 <sup>-/-</sup> vs D2 <sup>-/-</sup> + RS-1 | 1.8008E-09          |
|        | I <sup>-/-</sup> vs I <sup>-/-</sup> + RS-1   | 0.000040968         |
|        | ID2 DKO vs ID2 DKO + RS-1                     | 0.00031077          |
| S3A-B  | WT vs D2 <sup>-/-</sup> + HU 50 μM            | ns                  |
|        | WT vs D2 <sup>-/-</sup> + HU 100 μM           | ns                  |
|        | WT vs D2 <sup>-/-</sup> + HU 150 μM           | 0.013007            |
|        | WT vs D2 <sup>-/-</sup> + APH 10 nM           | 0.025805            |
|        | WT vs D2 <sup>-/-</sup> + APH 25 nM           | 0.022563            |
|        | WT vs D2 <sup>-/-</sup> + APH 50 nM           | 0.001225            |
|        | WT vs I <sup>-/-</sup> + HU 50 μM             | ns                  |
|        | WT vs I <sup>-/-</sup> + HU 100 μM            | ns                  |
|        | WT vs I <sup>-/-</sup> + HU 150 μM            | ns                  |
|        | WT vs I <sup>-/-</sup> + APH 10 nM            | ns                  |
|        | WT vs I <sup>-/-</sup> + APH 25 nM            | ns                  |
|        | WT vs I <sup>-/-</sup> + APH 50 nM            | ns                  |
|        | WT vs ID2 DKO + HU 50 μM                      | ns                  |
|        | WT vs ID2 DKO + HU 100 μM                     | ns                  |
|        | WT vs ID2 DKO + HU 150 μM                     | ns                  |
|        | WT vs ID2 DKO + APH 10 nM                     | ns                  |
|        | WT vs ID2 DKO + APH 25 nM                     | ns                  |
|        | WT vs ID2 DKO + APH 50 nM                     | 0.0293818           |
| S6     | PD20+D2 vs PD20+D2 + HU                       | 0.00052779          |
|        | PD20 vs PD20 + HU                             | 0.00204948          |

| <b>Figure</b> | <b>samples</b>                | <b>p-value (two tales)</b> |
|---------------|-------------------------------|----------------------------|
| <b>S8</b>     | <b>WT vs D2<sup>-/-</sup></b> | <b>0.001209</b>            |
|               | <b>WT vs I<sup>-/-</sup></b>  | <b>ns</b>                  |
|               | <b>WT vs ID2 DKO</b>          | <b>0.012742</b>            |

## 1      **Supplementary Figure S1**

2      (A) Schematic of the CRISPR/Cas9-mediated gene targeting to knockout *FANCD2* in WT cells  
3      to create *D2*<sup>-/-</sup> clone #29. A guide RNA was designed targeting *FANCD2* exon 11 with the  
4      Cas9 cut site overlapping with an endogenous BpuEI restriction enzyme recognition site.  
5      Indels introduced at the Cas9 cut site (red arrow) would disrupt the BpuEI cut site. Sequence  
6      confirmation of biallelic frameshift inducing mutations. (B) Schematic of the CRISPR/Cas9-  
7      mediated gene targeting to knockout *FANCI* in *D2*<sup>-/-</sup> clone #29 cells to create *ID2*<sup>-/-</sup> clone #3.  
8      A guide RNA was designed targeting *FANCI* exon 9 with the Cas9 cut site overlapping with  
9      an endogenous AcuI restriction enzyme recognition site. Indels introduced at the Cas9 cut site  
10     (red arrow) would disrupt the AcuI recognition sequence. Bottom: Sequence confirmation of  
11     biallelic frameshift-inducing mutations. (C) Schematic of the CRISPR/Cas9-mediated gene  
12     targeting to knockout *FANCI* in *D2*<sup>-/-</sup> clone #39 cells to create the *ID2*<sup>-/-</sup> DKO clone #4. A  
13     guide RNA was designed targeting *FANCI* exon 9 with the Cas9 cut site overlapping with an  
14     endogenous AcuI restriction enzyme recognition site. Indels introduced at the Cas9 cut site  
15     (red arrow) would disrupt the AcuI recognition sequence. Sequence confirmation of biallelic  
16     frameshift inducing mutations. (D-E) *D2*<sup>-/-</sup>, *I*<sup>-/-</sup> and *ID2* DKO cells do not express truncated  
17     forms of *FANCD2* or *FANCI*. (D) WCEs from WT, *D2*<sup>-/-</sup> (clone #39, exon 12 deletion), and  
18     *ID2* DKO (clone #1) cells were analyzed for the presence of full length *FANCD2* (166 kDa)  
19     and truncated *FANCD2* (expected size of truncated *FANCD2* expressed from exons 1-11: 35.8  
20     kDa) via western blot and whole membrane analysis using an antibody that recognizes the N-  
21     terminus of *FANCD2* (Santa Cruz; sc-20022, 1:1000). Tubulin was used as a loading control.  
22     (E) WCEs from WT, *I*<sup>-/-</sup> (clone 28, exon 10 deletion), and *ID2* DKO (clone #1) cells were  
23     analyzed for the presence of full length *FANCI* (146 kDa) and truncated *FANCI* protein

24 (expected size of truncated FANCI expressed from exons 1-9: 27.9 kDa) via western blot and  
25 whole membrane analysis using an antibody that recognizes the N-terminus of FANCI (Bethyl;  
26 A300-212, 1: 1000). *Note*: Samples were run only briefly on an 8-16% gradient gel to allow  
27 detection of small protein sizes. On these gels, a non-specific band appears to co-migrate with  
28 full length FANCI, however, longer sample runs on low % gradient gels reveal that there is no  
29 detectable full length FANCI protein in  $I^{-/-}$  and *ID2* DKO cells (Figure 3A, B).

### 30 **Supplementary Figure S2**

31 FANCD2 and FANCI act in concert to activate the MMC-triggered intra-S phase checkpoint.  
32 WT,  $D2^{-/-}$  (clones #29 and #39),  $I^{-/-}$  (clones #28 and #30) and *ID2* DKO (clones #1 and #2) cells,  
33 as well as the complemented counterparts, were untreated or treated with 10 nM MMC for 20  
34 hr, followed by propidium iodide (PI) staining and FACS analysis. Shown is a graphic  
35 representation of the average percentage of the indicated cell populations present in the G1, S  
36 and G2/M phases of the cell cycle. Average percentages were determined from a minimum of  
37 3 replicates and data points were averaged between clones of identical genetic backgrounds.

### 38 **Supplementary Figure S3**

39 (A) FANCD2, but not FANCI, promotes cellular resistance to HU. WT,  $D2^{-/-}$  (clone #29),  $I^{-/-}$   
40 (clone #30) and *ID2* DKO (clone #2) cells were plated at low density and incubated with  
41 increasing doses of HU (0 to 150  $\mu$ M) for 12 to 14 days to allow for single cell colony  
42 formation. Plates were fixed and stained with Coomassie, and colonies with a minimum of 50  
43 cells were scored. Results were averaged from a minimum of 3 replicates and normalized to  
44 the respective untreated cells. Error bars represent the standard deviation and significance was  
45 determined by t-test. Statistical significance at  $p < 0.05$ ,  $p < 0.01$ , and  $p < 0.001$  are indicated  
46 as \*, \*\*, \*\*\*, respectively. (B) FANCD2, but not FANCI, promotes cellular resistance to

47 APH. WT, *D2*<sup>-/-</sup> (clone #29), *I*<sup>-/-</sup> (clone #30) and *ID2* DKO (clone #2) cells were plated at low  
48 density and incubated with increasing doses of APH (0 to 50 nM) for 12 to 14 days to allow  
49 for single cell colony formation. Plates were fixed and stained with Coomassie, and colonies  
50 with a minimum of 50 cells were scored. Results were averaged from a minimum of 3  
51 replicates and normalized to the respective untreated cells. Error bars represent the standard  
52 deviation and significance was determined by t-test. Statistical significance at  $p < 0.05$ ,  $p <$   
53  $0.01$ , and  $p < 0.001$  are indicated as \*, \*\*, \*\*\*, respectively.

#### 54 **Supplementary Figure S4**

55 FANCD2 and FANCI cooperate to promote CtIP foci formation following replication stress.  
56 WT, *D2*<sup>-/-</sup> (clone #39), *I*<sup>-/-</sup> (clone #28) and *ID2* DKO (clone #1) cells were untreated or treated  
57 with 2 mM HU for 20 hr. Nuclear CtIP foci formation was analyzed by fluorescence  
58 microscopy and representative images were taken. Nuclei with >5 foci were considered  
59 positive for CtIP foci formation.

#### 60 **Supplementary Figure S5**

61 FANCD2 and FANCI are dispensable for RAD51 foci formation during replication stress.  
62 WT, *D2*<sup>-/-</sup> (clone #39), *I*<sup>-/-</sup> (clone #28) and *ID2* DKO (clone #1) cells were untreated or treated  
63 with 2 mM HU for 20 hr. Nuclear RAD51 foci formation was analyzed by fluorescence  
64 microscopy and representative images were taken. Nuclei with >5 foci were considered  
65 positive for RAD51 foci formation.

#### 66 **Supplementary Figure S6**

67 FANCD2 is dispensable for replication stress-induced RAD51 foci formation in a human  
68 fibroblast cell line. An FA-D2 patient-derived cell line (PD20) and its complemented

69 counterpart (PD20+D2) were untreated or treated with 2mM HU for 20 h. Cellular nuclei were  
70 analyzed for the presence of RAD51 foci. Nuclei with >5 foci were considered positive for  
71 RAD51 foci formation.

## 72 **Supplementary Figure S7**

73 FANCD2, but not FANCI, functions to promote ANHEJ-mediated DNA DSB repair. WT, *D2*<sup>-</sup>  
74 <sup>-</sup>(clone #39), *I*<sup>-</sup> (clone #28) and *ID2* DKO (clone #1) cells, as well as the complemented  
75 counterparts, were used for this analysis. In this assay, I-SceI digestion creates a DSB in the  
76 ANHEJ reporter plasmid (EJ2-GFP). Repair of the DSB by microhomology-mediated repair  
77 restores GFP expression. The repair percentage was determined by the number of dual GFP  
78 and mCherry positive cells divided by the number of mCherry positive cells (transfection  
79 control). Results were averaged from a minimum of 3 replicates. Error bars represent the  
80 standard deviation and significance was determined by t-test. Statistical significance at  $P<0.05$ ,  
81  $P<0.01$ ,  $P<0.001$ ,  $P<0.0001$  are indicated as \*, \*\*, \*\*\*, \*\*\*\* respectively.

## 82 **Supplementary Table 1**

83 List of primer sequences used during Golden Gate Cloning and for the confirmation of  
84 correctly targeted FANCD2 and FANCI exon sizes and sequences.

## 85 **Supplementary Table 2**

86 Summary of all P-values for results shown in Main Figures 4 to 8, and in Supplementary  
87 Figures S3, S6 and S8.
